# Supplementary material
Source: publisher site journal article supplement (https://www.dovepress.com/get_supplementary_file.php?f=443841.docx)
Supplement: Supplementary file 1 [file get_supplementary_file.php]

**Supplementary Table 1: Searching Strategy PubMed**

| **Concept 1** | **Concept 2** | **Concept 3** |
| --- | --- | --- |
| "bullying"[Mesh] OR “anti-bullying interventions”[tw] OR “bullying program”[tw] OR “bullying intervention”[tw] | "stress disorders, post-traumatic"[MeSH Terms] OR “post-traumatic stress disorder”[tw] OR “trauma”[tw] OR “PTSD”[tw] OR “stress disorder"[tw] | "adolescent"[MeSH Terms] OR “adolescents”[tw] OR “students”[tw] OR “young adult”[tw] OR “youth”[tw] |

**Supplementary Table 2: Searching Strategy Scopus**

| **Concept 1** | **Concept 2** | **Concept 3** |
| --- | --- | --- |
| ALL(bullying OR anti-bullying interventions OR bullying program OR bullying intervention) | ALL(post-traumatic stress disorder OR posttraumatic stress disorder OR trauma OR PTSD OR stress disorder) | ALL(adolescent OR adolescents OR students OR young adult OR youth) |

**Supplementary Table 3: Searching Strategy CINAHL**

| **Concept 1** | **Concept 2** | **Concept 3** |
| --- | --- | --- |
| bullying OR anti-bullying interventions OR bullying program OR bullying intervention | post-traumatic stress disorder OR posttraumatic stress disorder OR trauma OR PTSD OR stress disorder | adolescent OR adolescents OR young adult OR youth |
